# Supplementary material
Source: Springer Nature journal article supplement (https://www.springermedizin.de/resource/supplementary/13023_2011_278_MOESM1_ESM.pdf/9642010)
Supplement: MOESM1 [file 9642010]

**NF1 patients included in the cohort  
from 1980 to 2006**

**n=1895**

Vital status from medical records and  
database

Known, n=547

Unknown, n=1 348

Place of birth

Known, n=368

Unknown, n=980

Phone or mail contact

Answer, n=311

No answer, n=669

Known vital status, n=1226 (64.7%)

Unknown vital status, n=669 (35.3%)

Alive  
n=1159 (94.5%)

Deceased  
n=67 (5.5%)
